# Supplementary material for: Novel Bifunctional Single-Chain Variable Antibody Fragments to Enhance Virolysis by Complement: Generation and Proof-of-Concept
Source: Hindawi journal article supplement (doi:10.1155/2014/971345), 2014-01-01
Supplement: f1 [file 971345.f1.pdf]

supplemental data to figure 4.

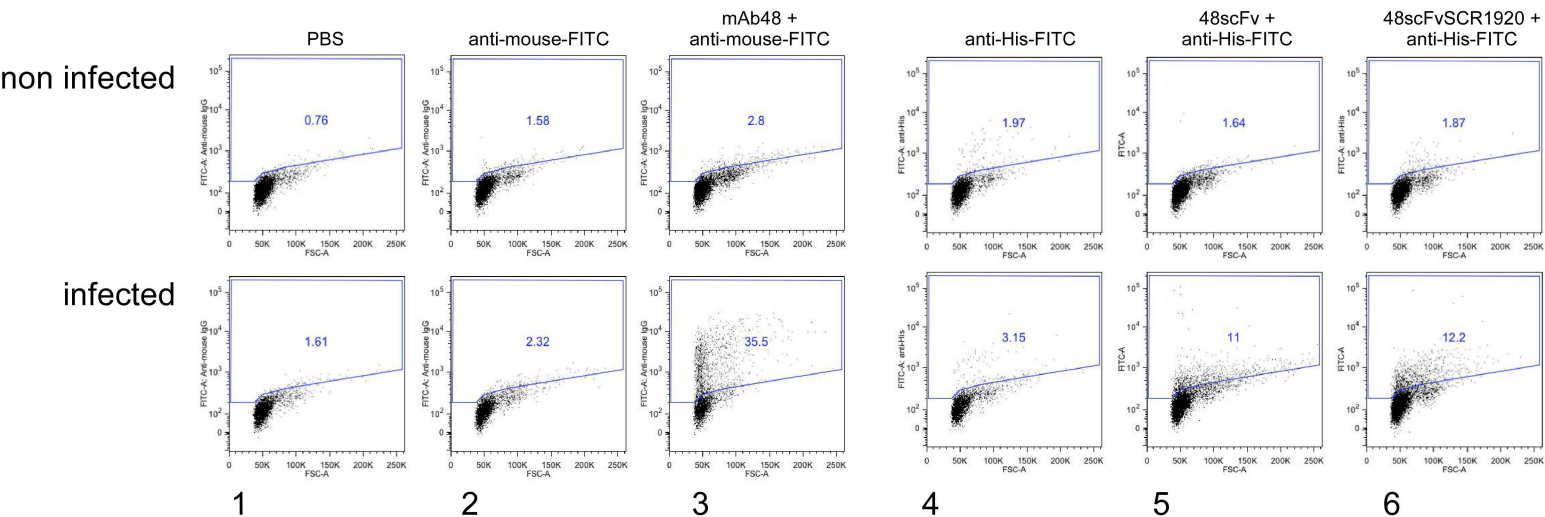

Column 1-3: Identification of infected *Mus dunni*-cell population using the monoclonal parent antibody clone 48 (mAb48). Column 4-6: The gate of mAb48-positive cells was used to identify functional single-chain Fv-constructs.

Non-infected *Mus dunni* cells served as negative control.

supplemental data to figure 5:

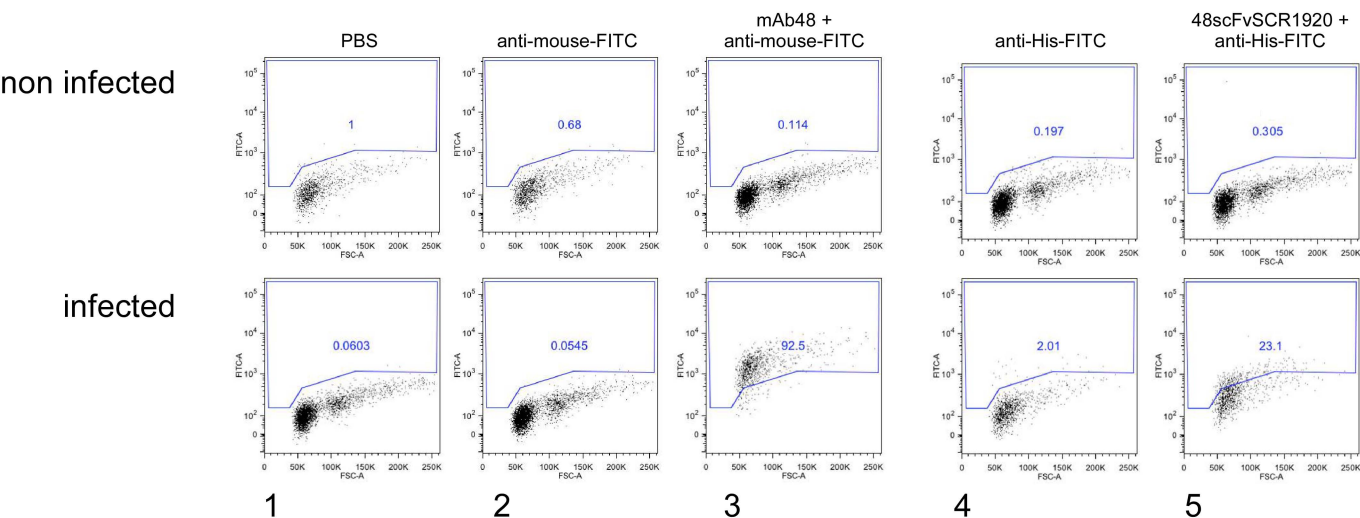

Column 1-3: Identification of infected *Mus dunni*-cell population using the monoclonal parent antibody clone 48 (mAb48). Column 4-5: The gate of mAb48-positive cells was used to identify functional single-chain Fv-construct.

Non-infected *Mus dunni* cells served as negative control.

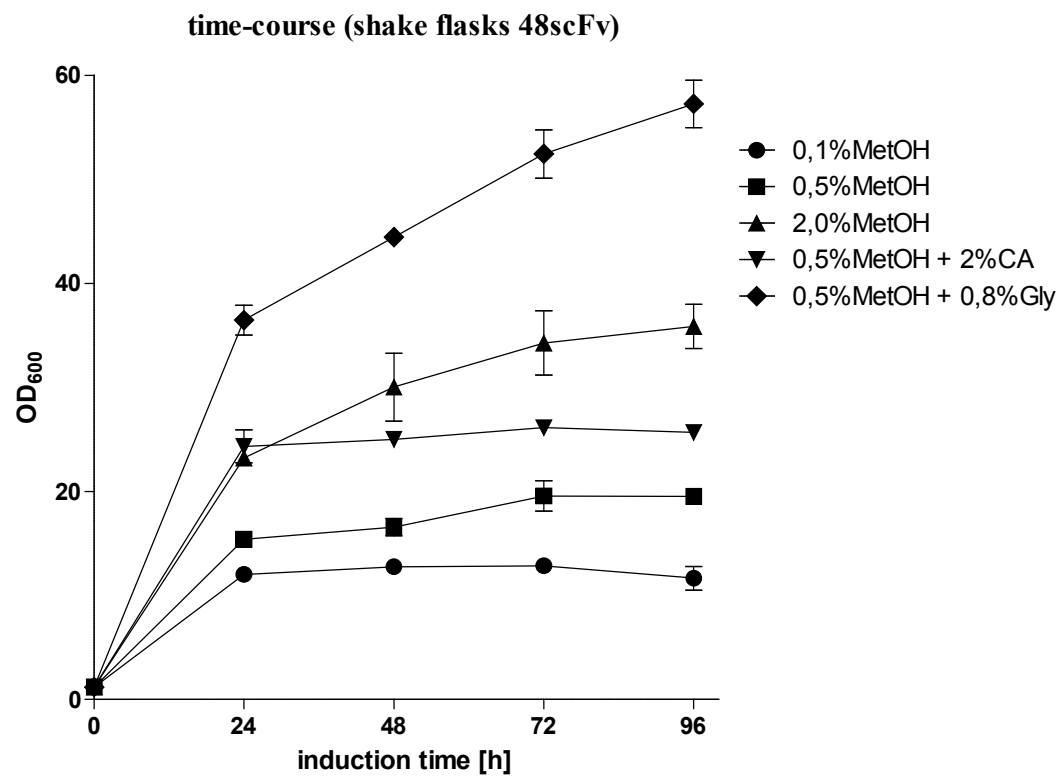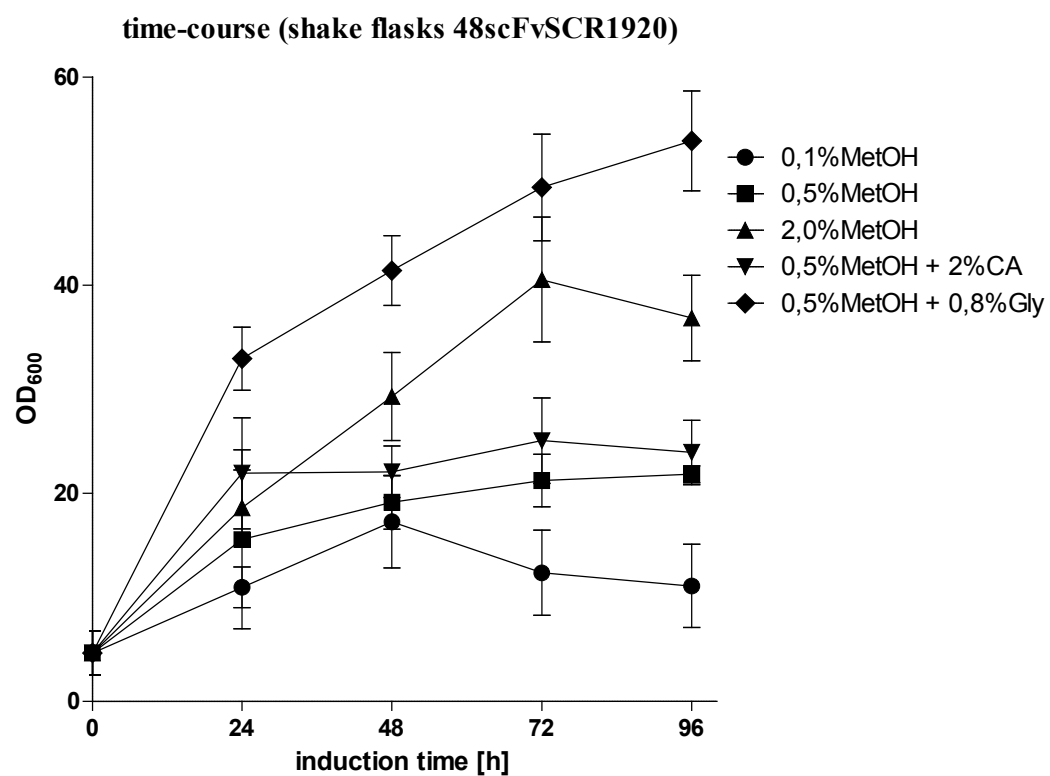

Biomass accumulation of *Pichia pastoris* expressing 48scFv and 48scFvSCR1920 in shake flasks under different conditions during 96h induction.

summarizing the cell viability of Pichia (shake flasks) after 96h induction

| 48scFv             | dead cells (SD)   | viability |
|--------------------|-------------------|-----------|
| 0,1% MetOH         | 0,77( $\pm$ 0,15) | 99,23     |
| 0,5% MetOH         | 0,53( $\pm$ 0,15) | 99,47     |
| 2,0% MetOH         | 1,23( $\pm$ 0,15) | 98,77     |
| 0,5% MetOH+2,0%CA  | 3,67( $\pm$ 0,15) | 96,33     |
| 0,5% MetOH+0,8%Gly | 0,27( $\pm$ 0,06) | 99,73     |
| 48scFvSCR1920      |                   |           |
| 0,1% MetOH         | 1,13( $\pm$ 0,06) | 98,87     |
| 0,5% MetOH         | 0,93( $\pm$ 0,06) | 99,07     |
| 2,0% MetOH         | 9,53( $\pm$ 1,38) | 90,47     |
| 0,5% MetOH+2,0%CA  | 1,67( $\pm$ 0,06) | 98,33     |
| 0,5% MetOH+0,8%Gly | 1,37( $\pm$ 0,15) | 98,63     |
